# Supplementary material for: Differential conditioning produces merged long-term memory in Drosophila
Source: eLife. 2021 Jul 19;10:e66499. doi: 10.7554/eLife.66499 (PMC8346281; doi:10.7554/eLife.66499)
Supplement: Figure 1—figure supplement 1—source data 1. [file elife-66499-fig1-figsupp1-data1.xlsx]

## Sheet: Sheet1
Fig. 1-f.s. 1	Raw data per N												Mean	SEM
CS+ vs CS-	29.57	30.16	36.4	28.7	35.54	21.25							30.27	2.23366
CS+ vs Novel	12.46	23.61	18.92	27.02	22.18	18.48	16.46	24.63					20.47	1.68817
CS- vs Novel	-20.05	-2.75	-13.97	0.81	-17.08	0.87							-8.695	3.84815
