# Supplementary material for: Differential conditioning produces merged long-term memory in Drosophila
Source: eLife. 2021 Jul 19;10:e66499. doi: 10.7554/eLife.66499 (PMC8346281; doi:10.7554/eLife.66499)
Supplement: Figure 1—figure supplement 2—source data 1. [file elife-66499-fig1-figsupp2-data1.xlsx]

## Sheet: Sheet1
Fig. 1-f.s. 2													Mean	SEM
OCT vs Air	Naïve	36.63	26.83	16.67	21.52	33.33	37.66	36.84	37.7				30.8975	2.90628
	CS+	35.14	53.33	44.09	58.33	51.81	60.87	44.76	38.05				48.2975	3.28615
	CS-	44.14	48.72	36.11	56.76	43.16	50.77	39.33	39.58				44.8212	2.42699
MCH vs Air	Naïve	23.2	43.18	28.07	47.69	35.59	38.95	38.1	23.53				34.7888	3.19592
	CS+	58.02	54.9	41.67	45.26	41.54	28.44	52.54	46.51				46.11	3.31169
	CS-	50.77	55.56	58.02	44.12	37.78	49.25	50.52	53.33				49.9187	2.28191
