# Supplementary material for: Differential conditioning produces merged long-term memory in Drosophila
Source: eLife. 2021 Jul 19;10:e66499. doi: 10.7554/eLife.66499 (PMC8346281; doi:10.7554/eLife.66499)
Supplement: Figure 1—source data 1. [file elife-66499-fig1-data1.xlsx]

## Sheet: Sheet1
Fig. 1A	Raw data per N												Mean	SEM
0h	75.66	69.22	75.28	80.73	84.64	67.92							75.575	2.63203
3h	43.58	35.67	25.96	38.83	17.35	25.27							31.11	4.02434
12h	1.09	21.13	10.63	3.41	14.88	21.71							12.1417	3.5614
24h	11.14	-9.51	6.35	-5.67	9.33	0.71							2.05833	3.41147
2day	1.11	-2.21	0	-0.51	6.65	-9.63	4.7	1.86					0.24625	1.73411
7day	-1.71	-2.61	-3.34	-5.02	10.25	-1.93	4.76	-4.87					-0.55875	1.88394
Fig. 1B													Mean	SEM
CS+ vs Novel	0h	70.68	61.89	67.95	67.24	69.67	65.76	73.51	66.38	54.45	63.35		66.088	1.68178
	3h	29.09	21.28	27.84	46.08	25.88	38.84	27.58	38.29	42.97	40.59		33.844	2.67167
	12h	20.95	16	42.38	14.55	14.83	34.33	24.21	15.76				22.8763	3.65735
	24h	24.22	16.12	14.88	8.91	34.43	11.5	2.47	13.8	39.81	14		18.014	3.64734
	2day	15.22	11.49	14.99	15	14.62	30.45	12.98	30.09				18.105	2.69217
	7day	4.29	15.64	30.26	26.53	11.44	8.27	15.89	17.11				16.1788	3.08515
CS- vs Novel	0h	-19.3	-5.92	-7.5	-13.06	-11.28	0.1	-4.04	-5.25	-34.47	-11.55		-11.227	3.10306
	3h	10.19	-4.27	11.85	-2.89	7.68	-1.47	-19.08	9.92	-1.47	0.18		1.064	2.95393
	12h	-8.46	14.98	18.68	18.76	-4.81	5.96	37.5	3.85				10.8075	5.24773
	24h	10.82	25.49	16.05	4.84	22.11	20.7	9.76	22.14	14.93	20.09		16.693	2.08319
	2day	19.6	24.4	11.03	15.06	21.48	10.46	14.77	15.21				16.5012	1.74209
	7day	16.22	24.94	17.09	13.19	10.98	14.92	16.38	9.69				15.4262	1.65157
Fig. 1C													Mean	SEM
CXM- CS+	10	26.26	17.62	18.21	20	15.03							17.8533	2.1993
CXM- CS-	16.41	18.74	18.06	11.8	15.28	13.96							15.7083	1.06033
CXM+ CS+	-7.1	-0.87	11.9	-5.9	20.39	-9.11							1.55167	4.87129
CXM+ CS-	-2.5	0.84	2.21	0	1.9	-6.4							-0.658333	1.33927
Fig. 1D													Mean	SEM
CS+ vs Novel	0h	-6.06	1.44	7.83	0	2.7	5.15						1.84333	1.94535
	3h	9.91	6.34	16.79	7.78	-0.87	-0.79	0.63	14.95				6.8425	2.43325
	8h	31.7	11.67	18.48	11.24	16.62	12.89						17.1	3.1456
	23h	7.48	21.43	21.34	18.84	8.67	16.67	32.02	3.46				16.2388	3.29033
CS- vs Novel	0h	-0.87	1.26	7.13	-18.25	1.14	12.99						0.566667	4.29867
	3h	1.68	10.25	5.33	-0.99	-3.04	30.31	5.31	5.58				6.80375	3.6699
	8h	29.56	12.82	6.98	12.18	11.62	20.67						15.6383	3.31736
	23h	13.86	16	7.69	7.07	8.49	10.58	19.05	18.15				12.6112	1.6967
