# Supplementary material for: Differential conditioning produces merged long-term memory in Drosophila
Source: eLife. 2021 Jul 19;10:e66499. doi: 10.7554/eLife.66499 (PMC8346281; doi:10.7554/eLife.66499)
Supplement: Figure 2—figure supplement 1—source data 1. [file elife-66499-fig2-figsupp1-data1.xlsx]

## Sheet: Sheet1
Fig. 2-f.s. 1													Mean	SEM
CS+ vs Novel	Differential	16.62	15.97	18.86	12.66	18.12	13.61						15.9733	0.998711
	Absolute	13.49	0.42	10.16	-13.46	18.75	0.58	-0.15	-3.72				3.25875	3.65317
CS- vs Novel	Differential	18.38	17.92	15.25	13.72	18.98	13.93						16.3633	0.957165
	Absolute	-7.89	-5.36	12.54	-3.59	9.98	11.73	-1.59	-5.22				1.325	3.02975
