# Supplementary material for: Differential conditioning produces merged long-term memory in Drosophila
Source: eLife. 2021 Jul 19;10:e66499. doi: 10.7554/eLife.66499 (PMC8346281; doi:10.7554/eLife.66499)
Supplement: Figure 2—source data 1. [file elife-66499-fig2-data1.xlsx]

## Sheet: Sheet1
Fig. 2A													Mean	SEM
(no)CS+	18.01	20.27	10.11	21.11	12.04	25.91							17.9083	2.41603
(no)CS-	15.45	15.88	14.59	33.14	6.08	20.37							17.585	3.6447
(CS+)CS+	0.56	-7.14	8.82	6.53	-0.52	-6.13							0.353333	2.63834
(CS+)CS-	5.88	6.09	9.34	-4.67	-7.13	3							2.085	2.6737
(CS-)CS+	-2.45	1.79	5.54	-1.45	-4.48	9.55							1.41667	2.16973
(CS-)CS-	-1.43	-5.26	-3.6	-4.26	-0.22	2.07							-2.11667	1.12948
Fig. 2B													Mean	SEM
45-s CS+	16.4	16.84	9.94	15.93	23.28	17.92							16.7183	1.7434
45-s CS-	7.13	10.59	12.35	28.62	33.7	2.52	21.52	13.88					16.2888	3.8028
2-min CS+	18.67	9.26	10.33	15.94	2.65	8.13							10.83	2.34162
2-min CS-	10.12	2.84	3.35	12.93	14.87	24.34							11.4083	3.27383
5-min CS+	11.73	8.52	2.32	9.07	-0.57	2.16							5.53833	1.98983
5-min CS-	-0.83	3.36	-2.39	8.83	8.62	9.23							4.47	2.12345
10-min CS+	5.75	4.95	1.36	-5.69	2.49	-1.43							1.23833	1.74007
10-min CS-	-0.79	0.92	10.51	-3.82	0.94	4.17							1.98833	2.00894
20-min CS+	-2.38	2.4	2.86	3.21	9.66	-1.37							2.39667	1.73817
20-min CS-	2.41	-3.35	-10.03	-0.17	-6.77	14.58							-0.555	3.53186
Fig. 2C													Mean	SEM
1st CS+	16.4	16.84	9.94	15.93	23.28	17.92							16.7183	1.7434
1st CS-	7.13	10.59	12.35	28.62	21.52	13.88							15.6817	3.2398
2nd CS-	19.65	18.86	17.94	15.56	6.3	10.38							14.7817	2.17737
2nd CS+	12.51	9.89	27.6	7.76	11.64	22.73							15.355	3.23407
