# Supplementary material for: Differential conditioning produces merged long-term memory in Drosophila
Source: eLife. 2021 Jul 19;10:e66499. doi: 10.7554/eLife.66499 (PMC8346281; doi:10.7554/eLife.66499)
Supplement: Figure 3—figure supplement 2—source data 1. [file elife-66499-fig3-figsupp2-data1.xlsx]

## Sheet: Sheet1
Fig. 3-f.s. 2													Mean	SEM
CS+ vs Novel	UAS-Shi/+	75.74	54.86	70	60.29	68.76	62.7	77.33	44.37				64.2562	3.91421
	R58E02/UAS-Shi	57.92	59.05	61.98	65.12	56.09	76.45						62.7683	3.02915
	R52H03/UAS-Shi	19.65	-9.79	20.05	-9.82	7.04	8.01	-10.01	-1.75				2.9225	4.49018
	TH-Gal4/UAS-Shi	31.67	13.01	22.2	-9.52	-0.59	-6.34						8.405	6.76363
CS- vs Novel	UAS-Shi/+	0.7	-3.8	-4.25	0.78	-4.17	-7.11	-1.56	0.83				-2.3225	1.04806
	R58E02/UAS-Shi	13.59	31.83	7.27	-1.01	12.22	27.24						15.19	5.02872
	R52H03/UAS-Shi	-2.55	-4.35	-0.3	-13.39	-0.38	-14.96	-22.54	-24.81				-10.41	3.49846
	TH-Gal4/UAS-Shi	-1.18	-5.41	-6.25	-15.89	-25.95	-27.78						-13.7433	4.59736
