# Supplementary material for: Differential conditioning produces merged long-term memory in Drosophila
Source: eLife. 2021 Jul 19;10:e66499. doi: 10.7554/eLife.66499 (PMC8346281; doi:10.7554/eLife.66499)
Supplement: Figure 3—source data 1. [file elife-66499-fig3-data1.xlsx]

## Sheet: Sheet1
Fig. 3A													Mean	SEM
CS+ vs Novel	UAS-Shi/+	15.28	12.93	17.72	9.21	17.28	12.17	25.29	13.73				15.4512	1.71319
	R58E02/UAS-Shi	22.05	10.7	8.03	19.11	22.57	8.18						15.1067	2.81315
	R52H03/UAS-Shi	-4.1	22.79	9.26	-1.8	5.37	-1.33	-7.14	9.72				4.09625	3.45122
	TH-Gal4/UAS-Shi	18.62	11.58	14.66	9.9	-14.62	-3						6.19	5.12046
CS- vs Novel	UAS-Shi/+	10.74	21.27	11.51	5.02	12.4	18.88	21.63					14.4929	2.35641
	R58E02/UAS-Shi	18.97	29.52	7.55	7.4	6.19	14.28						13.985	3.70498
	R52H03/UAS-Shi	2.93	-8.9	1.18	-11.54	-6.18	3.16	-3.13	12.28				-1.275	2.7325
	TH-Gal4/UAS-Shi	3.7	13.53	3.97	7.87	-0.84	-6.78						3.575	2.85446
Fig. 3B													Mean	SEM
CS+ vs Novel	PanKC-Gal4/+	6.13	22.22	37.22	16.26	22.16	9.39						18.8967	4.53782
	UAS-Shi/+	29.73	11.42	6	12.9	17.99	23.96	9.8	6.06				14.7325	3.02021
	PanKC-Gal4/UAS-Shi	-15.23	5.09	7.7	-9.3	3.63	3.13	-18.86	14.19				-1.20625	4.16626
CS- vs Novel	PanKC-Gal4/+	12	16.02	7.61	39.58	19.49	12.17						17.8117	4.65319
	UAS-Shi/+	9.24	6.08	6.33	13.98	17.66	7.05	10.03	28.79				12.395	2.73799
	PanKC-Gal4/UAS-Shi	-4.42	-9.51	-9.3	-5.91	10.35	9.35	-4.99	-0.11				-1.8175	2.753
Fig. 3C													Mean	SEM
CS+ vs Novel	UAS-Shi/+	23.02	0.28	20.63	21.15	25.41	12.55						17.1733	3.81466
	C739-Gal4/UAS-Shi	7.06	6.9	5.22	1	10.22	5.88	-12.4	11.34				4.4025	2.64583
	VT30604-Gal4/UAS-Shi	28.52	21.75	19.22	26.62	11.54	8.41	9.79	6.56				16.5512	3.03466
	5HT1b-Gal4/UAS-Shi	17.26	9.37	32.95	2.32	24.81	25						18.6183	4.60967
CS- vs Novel	UAS-Shi/+	12.07	18.65	26.49	23.75	5.75	26.24						18.825	3.43805
	C739-Gal4/UAS-Shi	-9.84	-5.23	12.7	-20.55	-19.74	2.55	13.51	4.78				-2.7275	4.72417
	VT30604-Gal4/UAS-Shi	19.64	26.98	6.57	23.03	21.49	4.28	6.54	15.01				15.4425	3.06955
	5HT1b-Gal4/UAS-Shi	18.71	19.93	24.88	21.07	6.73	9.55						16.8117	2.89212
