# Supplementary material for: Differential conditioning produces merged long-term memory in Drosophila
Source: eLife. 2021 Jul 19;10:e66499. doi: 10.7554/eLife.66499 (PMC8346281; doi:10.7554/eLife.66499)
Supplement: Figure 4—figure supplement 2—source data 1. [file elife-66499-fig4-figsupp2-data1.xlsx]

## Sheet: Sheet1
Fig. 4-f.s. 2													Mean	SEM
CS+ vs Novel	UAS-Kir2.1;tub-gal80/+	17.44	21.99	1.71	15.83	32.35	-4.58						14.1233	5.51336
	R71D08-Gal4/UAS-Kir2.1;tub-gal80	-12.65	8.48	5.15	7.29	-1.43	-15.58						-1.45667	4.25695
CS- vs Novel	UAS-Kir2.1;tub-gal80/+	12.12	16.2	12.46	21.6	10.42	16.96						14.96	1.67883
	R71D08-Gal4/UAS-Kir2.1;tub-gal80	-5.24	-3.13	12.66	2.61	-5.77	11.29						2.07	3.36348
