# Supplementary material for: Differential conditioning produces merged long-term memory in Drosophila
Source: eLife. 2021 Jul 19;10:e66499. doi: 10.7554/eLife.66499 (PMC8346281; doi:10.7554/eLife.66499)
Supplement: Figure 4—source data 1. [file elife-66499-fig4-data1.xlsx]

## Sheet: Sheet1
Fig. 4A													Mean	SEM
CS+ vs Novel	R71D08-Gal4/+	7.02	10.58	28.42	17.67	18.45	28.54	26.25	16.12	11.28	25.94		19.027	2.50521
	UAS-Shi/+	17.31	23.13	18.23	17.74	35.95	7.58						19.99	3.80321
	R71D08-Gal4/UAS-Shi	-4.55	0.39	11.98	3.85	-14.89	-9.11	30.14	4.29	-7.83	12.28		2.655	4.1531
CS- vs Novel	R71D08-Gal4/+	9.64	9.85	33.62	12.11	16.41	9.58	22.82	9.02	16.61	21.67		16.133	2.52285
	UAS-Shi/+	12.59	7.19	10.97	13.43	11.8	27.05	10.37	32.8				15.775	3.20275
	R71D08-Gal4/UAS-Shi	3.63	6.88	1.23	12.75	0.89	8.46	3.41	15.9	-3.33	-10.23		3.959	2.40461
Fig. 4B													Mean	SEM
CS+ vs Novel	G0239-Gal4/+	16.32	9.21	30.21	12.17	8.95	13.73						15.0983	3.22892
	UAS-Shi/+	23.3	8.26	20.1	14.08	15.03	16.8						16.2617	2.12025
	G0239-Gal4/UAS-Shi	16.54	11.04	16.69	1.59	22.75	20.04						14.775	3.08706
CS- vs Novel	G0239-Gal4/+	19.1	12.31	24.17	17.26	2.27	23.93						16.5067	3.37353
	UAS-Shi/+	14.71	19.64	29.17	13.68	18.14	6.18						16.92	3.1074
	G0239-Gal4/UAS-Shi	15.73	9.82	9.1	13.29	15.33	17.17						13.4067	1.35012
