# Supplementary material for: Differential conditioning produces merged long-term memory in Drosophila
Source: eLife. 2021 Jul 19;10:e66499. doi: 10.7554/eLife.66499 (PMC8346281; doi:10.7554/eLife.66499)
Supplement: Figure 5—figure supplement 1—source data 1. [file elife-66499-fig5-figsupp1-data1.xlsx]

## Sheet: Sheet1
Fig. 5-f.s. 1													Mean	SEM
Novel	0.295224	1.61304	1.51124	0.504003	1.04222	3.07861	1.80912	0.214685	0.696822				1.19611	0.305494
CS+	0.0080211	0.622811	0.304687	0.366551	0.251252	1.31459	0.660688	0.198974	0.132405				0.428886	0.131474
CS-	0.238386	0.57142	0.220656	0.294198	0.61402	1.41757	0.400144	0.273142	0.0852056				0.457194	0.132595
