# Supplementary material for: Differential conditioning produces merged long-term memory in Drosophila
Source: eLife. 2021 Jul 19;10:e66499. doi: 10.7554/eLife.66499 (PMC8346281; doi:10.7554/eLife.66499)
Supplement: Figure 5—source data 1. [file elife-66499-fig5-data1.xlsx]

## Sheet: Sheet1
Fig. 5A													Mean	SEM
Novel	0.721688	1.39314	0.966073	1.09165	1.59456	0.652656	0.911184	0.755726	0.75043				0.981901	0.10818
CS+	0.272074	0.92676	0.562019	0.893499	0.416495	0.0847676	0.901044	0.759156	0.617333				0.603683	0.099803
CS-	0.101653	0.281321	0.35418	0.0416967	0.564133	0.604771	1.33088	0.338064	0.262093				0.430977	0.128193
Fig. 5B													Mean	SEM
Novel	0.733366	0.660695	0.992593	0.498607	1.40188	0.561612	0.184214	3.11446					1.01843	0.325277
CS+	0.938217	0.643921	1.14739	0.235353	1.13251	0.658116	0.0722488	2.42473					0.906561	0.256772
CS-	0.781544	0.799818	1.2361	0.960292	0.77017	0.884253	0.0973307	3.02974					1.06991	0.301985
